# Supplementary material
Source: publisher figshare collection journal article supplement (https://karger.figshare.com/ndownloader/files/24493283)
Supplement: Supplementary file 1 [file 24493283]

**Suppl.Table 2. Baseline demographic and clinical characteristics, and etiologies of enrolled renal thrombotic microangiopathy patients (n=63)**

| Male/female | 41/22 |
| --- | --- |
| Age(mean±s.d., range), yrs | 36±11(15-71) |
| SBP(mean±s.d.), mmHg | 146±26 |
| DBP(mean±s.d.), mmHg | 95±17 |
| Thrombocytopenia, n (%) | 22(34.9) |
| Anemia, n (%) | 42(66.7) |
| Hypocomplementemia, n(%) | 18(28.6)a |
| LDH(mean±s.d.), IU/L | 690±963b |
| Proteinuria(mean±s.d.), g/d | 2.5±2.4c |
| Nephrotic range proteinuria, n(%) | 15(24.6)c |
| Nephrotic syndrome, n(%) | 5(8.2)c |
| Hematuria, n (%,occult/gross) | 30(47.6, 29/1) |
| Serum creatinine (mean±s.d.), mg/dL | 3.6±2.5 |
| eGFR (mean±s.d.), mL/min per 1.73 m2 | 36.3±30.5 |
| AKI, n (%) | 41(65.1) |
| Etiologies, n(%) |  |
| aHUS | 11(17.5) |
| TTP | 1(1.6) |
| Pregnancy | 9(14.3) |
| Malignant hypertension | 31(49.2) |
| Castleman’s disease | 6(9.5) |
| HSCT | 4(6.3) |
| pAPS | 1(1.6) |
| Abbreviations: SBP, systolic blood pressure; DBP, diastolic blood pressure; LDH, lactate dehydrogenase; eGFR, estimated glomerular filtration rate; AKI, acute kidney injury; aHUS, atypical hemolytic uremic syndrome; TTP, thrombotic thrombocytopenic purpura; HSCT, hematopoietic stem cell transplantation; pAPS, primary antiphospholipid syndrome  aExcluding 7 individuals with no information on C3 level at the time of biopsy.  bExcluding 21 individuals with no information on LDH at the time of biopsy.  cExcluding 2 individuals with no information on proteinuria at the time of biopsy. | |
